# 1 **qDSB-Seq: quantitative DNA double-strand break sequencing**

2 Yingjie Zhu<sup>1,9</sup>, Anna Biernacka<sup>2,9</sup>, Benjamin Pardo<sup>3</sup>, Norbert Dojer<sup>1,4</sup>, Romain Forey<sup>3</sup>, Magdalena  
3 Skrzypczak<sup>3</sup>, Bernard Fongang<sup>1</sup>, Jules Nde<sup>1</sup>, Raziye Yusefi<sup>1</sup>, Philippe Pasero<sup>3</sup>, Krzysztof Ginalski<sup>2</sup> and  
4 Maga Rowicka<sup>1,5,6,7,8</sup>

5

6 <sup>1</sup> Department of Biochemistry and Molecular Biology, University of Texas Medical Branch at Galveston,  
7 Galveston, Texas, USA.

8 <sup>2</sup> Laboratory of Bioinformatics and Systems Biology, Centre of New Technologies, University of Warsaw,  
9 Warsaw, Poland.

10 <sup>3</sup> Institute of Human Genetics, Montpellier, France.

11 <sup>4</sup> Institute of Informatics, University of Warsaw, Warsaw, Poland.

12 <sup>5</sup> Institute for Translational Sciences, University of Texas Medical Branch at Galveston, Galveston, Texas,  
13 USA.

14 <sup>6</sup> Sealy Center for Molecular Medicine, University of Texas Medical Branch at Galveston, Galveston,  
15 Texas, USA.

16 <sup>7</sup> Sealy Center for Structural Biology and Molecular Biophysics, University of Texas Medical Branch at  
17 Galveston, Galveston, Texas, USA.

18 <sup>8</sup> Correspondence should be addressed to M.R. (Maga.Rowicka@utmb.edu)

19 <sup>9</sup> These authors contributed equally

20

21 Short title: Quantitative DSB sequencing

22 Keywords: DNA double-stranded break, quantitative DSB sequencing, restriction enzyme, Zeocin,  
23 hydroxyurea, camptothecin, replication fork, fork barrier

24

## 25 **Abstract**

26 Sequencing-based methods for mapping DNA double-strand breaks (DSBs) allow  
27 measurement only of relative frequencies of DSBs between loci, which limits our  
28 understanding of the physiological relevance of detected DSBs. We propose quantitative  
29 DSB sequencing (qDSB-Seq), a method providing both DSB frequencies per cell and their  
30 precise genomic coordinates. We induced spike-in DSBs by a site-specific endonuclease  
31 and used them to quantify labeled DSBs (e.g. using i-BLESS). Utilizing qDSB-Seq, we  
32 determined numbers of DSBs induced by a radiomimetic drug and various forms of  
33 replication stress, and revealed several orders of magnitude differences in DSB frequencies.  
34 We also measured for the first time Top1-dependent absolute DSB frequencies at  
35 replication fork barriers. qDSB-Seq is compatible with various DSB labeling methods in  
36 different organisms and allows accurate comparisons of absolute DSB frequencies across  
37 samples.

38

## 39 **Introduction**

40 There is tremendous interest in precisely measuring DNA double-strand breaks (DSBs)  
41 genome-wide since such measurement can give key insights into DNA damage and repair,

42 cancer development<sup>1</sup>, radiation biology, and also increasingly popular genome editing  
43 techniques<sup>2</sup>. Starting with our BLESS method<sup>3</sup>, several high-resolution and direct methods  
44 to label DSBs genome-wide have recently been developed<sup>4-7</sup>, which have opened up new  
45 possibilities for sensitive and specific detection of DSBs. For example, BLESS was applied  
46 in identifying the on-target and off-target cutting sites of Cas9 endonuclease<sup>8</sup> and studying  
47 DSB repair<sup>9</sup>. However, we still lack an effective strategy to both precisely detect DSB  
48 distribution genome-wide and quantify their absolute frequencies per cell, which is crucial  
49 to assess physiological relevance of detected DSBs. Immunofluorescence microscopy in  
50 combination with  $\gamma$ -H2AX and 53BP1 antibodies was used to count breaks per cell<sup>10</sup>, but  
51 does not allow determining their precise locations. Moreover, counting discrete nuclear  
52 foci is an imprecise way to estimate DSB numbers per cell both due to DSB clustering and  
53 limited specificity of antibodies. Quantitative Polymerase Chain Reaction (qPCR) based  
54 methods can estimate absolute break frequency but only at selected loci<sup>11</sup>. An approach  
55 was developed recently to quantify breaks globally based on amount of radiolabeled DNA  
56 and locally based on DNA break immunocapture<sup>12</sup>, but its accuracy in detecting  
57 physiological DSBs was not tested. BLISS<sup>7</sup> quantifies DSBs by utilizing unique molecular  
58 identifiers (UMIs) to identify unique DSB ends and counting cells in the sample. BLISS  
59 is designed for detecting DSBs in samples with low number of cells and thus shares  
60 challenges of single-cell sequencing, such as low genome coverage and over-amplification.  
61 Moreover, employment of UMIs is challenging. Short UMIs may lead to UMI collisions<sup>13</sup>  
62 (i.e. observing two reads with the same sequence and the same UMI barcode but originating  
63 from two different genomic molecules), especially in case of DSBs enriched in specific  
64 locations. Long UMIs may interfere with primer sequence binding and accumulate  
65 sequencing errors, which may lead to severe overestimation of DSBs<sup>14</sup>.

66 This lack of a general method and computational solution to simultaneously determine  
67 DSB frequencies per cell and their precise genomic loci limits our understanding of the  
68 physiological relevance of observed DSBs and hinders comparisons between experiments.  
69 Here, we propose quantitative DSB sequencing (qDSB-Seq), an approach that allows  
70 measuring DSB frequencies per cell genome-wide, and a computational solution to achieve  
71 accurate quantification. Our approach relies on inducing spike-in DSBs by a site-specific  
72 endonuclease, which are used to quantify DSBs detected by a DSB labeling method e.g. i-  
73 BLESS<sup>15</sup> and can be combined with any DSB labeling technique. We present a  
74 comprehensive validation and several applications of qDSB-Seq: quantifying DSBs  
75 induced by a radiomimetic drug, occurring during replication stress and caused by natural  
76 replication fork barriers.

77

## 78 **Results**

79 **qDSB-Seq implementation, computational method and validation.** qDSB-Seq is a  
80 combination of genome-wide high-resolution DSB-labeling (i-BLESS<sup>15</sup>, BLESS<sup>3</sup>, END-  
81 seq<sup>6</sup>, etc.) and inducing DSBs (spike-ins) in pre-determined loci using a site-specific  
82 endonuclease (**Fig. 1a-c**). Quantification is based on an assumption (verified below) that  
83 the number of labeled reads at a given genomic locus resulting from DSB sequencing is  
84 proportional to the underlying DSB frequency (proportionality coefficient  $\alpha$  in **Fig. 2a**).

85 To estimate this coefficient  $\alpha$ , we induce spike-in DSBs at pre-determined genomic loci  
86 and, relying on knowledge of their exact genomic locations, quantify their frequency using

87 genomic DNA sequencing (gDNA) or qPCR (**Fig. 1a, Fig. 2a**). The spike-in DSBs are  
88 created by digestion with a restriction endonuclease before DSB labeling (**Fig. 1b,c**). Next,  
89 the frequency of induced spike-in DSBs,  $B_{cut}$ , is calculated from enzyme cutting efficiency,  
90  $f_{cut}$ , that is calculated from gDNA sequencing data based on numbers of cut and uncut DNA  
91 fragments covering cutting sites in gDNA (**Fig. 2a, Methods**), or qPCR data  
92 (**Supplementary Fig. 1, Methods**).

93 Finally, the absolute frequency of studied DSBs,  $B_{studied}$ , is estimated from DSB sequencing  
94 data:

$$95 \quad B_{studied} = \frac{R_{studied}}{\alpha}, \text{ where } \alpha = \frac{R_{cut}}{B_{cut}} \quad (1)$$

96 and  $R_{studied}$  and  $R_{cut}$  are the numbers of labeled reads originating from studied DSBs and  
97 from enzyme cutting sites (spike-ins), respectively, and  $B_{cut} \sim f_{cut}$ .

98 **Reproducibility and accuracy of cutting efficiency estimation.** The number of labeled  
99 reads per DSB (coefficient  $\alpha$ ) which is used for the final DSB quantification, as explained  
100 above, is computed from enzyme cutting efficiency,  $f_{cut}$  (**Equation (1), Methods**).  
101 Therefore, to calculate  $\alpha$  accurately, we need to be able to estimate enzyme cutting  
102 efficiency accurately. Commonly qPCR is used for precise measurement of cutting  
103 efficiencies, however, this technique is inconvenient to use for multiple cutting sites. Thus,  
104 we propose to use gDNA sequencing to determine spike-in cutting efficiencies (**Fig. 2a,**  
105 **Methods**). To verify the accuracy and reproducibility of our proposed approach, we treated  
106 immobilized and deproteinized yeast DNA with NotI enzyme and compared cutting  
107 efficiencies at its recognition sites calculated using gDNA sequencing data and qPCR. The  
108 cutting efficiencies for the selected NotI cutting site were highly consistent: 61% for gDNA  
109 sequencing and 62% for qPCR. To examine if our approach can also be applied to breaks  
110 introduced *in vivo*, which can be subjected to repair and resection, we used a yeast strain  
111 engineered to produce a single site-specific DSB by I-SceI endonuclease *in vivo*. Cutting  
112 efficiencies calculated based on gDNA sequencing and based on qPCR (**Supplementary**  
113 **Fig. 1, Methods**) were again very consistent: 71% and 73%, respectively (**Fig. 2b**). We  
114 therefore conclude that our method of estimating enzymes cutting efficiency based on  
115 gDNA sequencing yields accurate and precise results.

116 **Dependence of quantification on enzyme choice and types of breaks induced.** DSBs  
117 occurring *in vivo* are subject to DNA damage repair and therefore might be labeled with  
118 different efficiencies than breaks induced *in vitro*. Moreover, different types of double-  
119 stranded DNA ends (blunt or sticky) could also be detected more or less efficiently by a  
120 given DSB labeling method. We therefore asked whether any restriction enzyme and any  
121 manner of digestion can be applied to create spike-in DSBs that would lead to accurate  
122 quantification. First, to test if restriction enzyme choice or the types of double-stranded  
123 DNA ends influences our quantification results, we determined the spontaneous DSB  
124 frequencies in yeast G<sub>1</sub> phase cells using NotI or SrfI spike-ins, which create sticky and  
125 blunt ends, respectively. The number of spontaneous breaks in G<sub>1</sub> phase cells estimated  
126 using these enzymes was consistent:  $0.9 \pm 0.3$  DSBs per cell for NotI spike-in and  $1.0 \pm$   
127  $0.6$  DSBs per cell for SrfI spike-in (**Fig. 2c**). Then, to test if the results are affected by the  
128 manner of digestion, we compared DSB estimations based on quantification using NotI (5'  
129 overhangs) *in vitro* digestion and I-SceI (3' overhangs) *in vivo* digestion in HU-treated  
130 wild-type cells (described below). Again, results were highly similar:  $137 \pm 12$  and  $153$

131  $\pm 52$  DSBs per cell (**Fig. 2d**). In conclusion, qDSB-Seq provided consistent results in all  
132 tested cases irrespective of the restriction enzyme used, types of DNA ends created by that  
133 enzyme, or the manner of digestion.

134 **Dependence of accurate quantification on adequate cutting efficiency.** For accurate  
135 quantification of studied DSBs, it is necessary that the relationship between the number of  
136 labeled reads and DSB frequencies at different genomic locations is linear (**Equation (1),**  
137 **Fig. 2a**). This relationship could be affected by the frequencies of spike-in DSBs, which is  
138 determined by an enzyme cutting efficiency. Therefore, we asked whether any frequency  
139 of induced spike-in DSBs (i.e. any enzyme cutting efficiency) can be employed. To test  
140 the influence of enzyme cutting efficiency on the quantification results, we performed 35  
141 digestions for 25 samples using enzymes with multiple cutting sites (NotI, SrfI, AsiSI, and  
142 BamHI) and then tested the linear relationship between the labeled reads and cutting  
143 efficiencies for each digestion using Pearson Correlation Coefficient. We observed that  
144 strong correlation ( $R > 0.5$ ) (e.g. **Fig. 2e**) was always achieved for cutting efficiencies  
145 between 12% and 62% (**Supplementary Fig. 2, Supplementary Table 2**) and for some  
146 lower cutting efficiencies (4-12%). However, for the extreme cutting efficiencies (higher  
147 than 84% or lower than 4%) the correlation was always weak (**Supplementary Fig. 3**). In  
148 such cases, the number of observed cut or uncut fragments was low, making our estimates  
149 less accurate, which likely decreased the correlation. Moreover, small variations in  $f_{cut}$   
150 between sites contributed to the decreased correlation (**Supplementary Fig. 3**).  
151 Additionally, in samples for which digestion efficiencies are very high, the elevated level  
152 of reads at spike-in sites ( $> 75\%$ ) (**Supplementary Table 1**) can potentially disrupt (due  
153 to low initial sequence diversity) Illumina sequencing<sup>16</sup>. Taken together, we conclude that  
154 adequate cutting frequencies (4% to 84%) lead to a constant ratio between the labeled reads  
155 and the cutting efficiencies for accurate quantification.

156 **Stability of estimation of DSB frequencies per cell.** We next asked whether our method  
157 generates reproducible results. To test this, we calculated DSB frequencies in untreated  $G_1$   
158 cells based on different spike-ins. In spite of the various enzymes used (NotI, SrfI) we  
159 obtained a very consistent number of DSBs (**Fig. 2f, Supplementary Fig. 4,**  
160 **Supplementary Table 1**). Based on our calculations the frequency of spontaneous DSBs  
161 in untreated  $G_1$  wild-type cells is  $1.0 \pm 0.4$  DSBs per cell, both the average and the range  
162 (0.6-1.7 DSBs per cell) are consistent with previous studies<sup>17, 18</sup> (**Supplementary Table**  
163 **1**). Further, we quantified DSBs based on the individual cutting sites in each of these  
164 samples. The variation of the DSB quantification results depending on the individual  
165 cutting sites used was lower than the average value (**Supplementary Table 1**). Similarly,  
166 in *pif1* mutants, where stability of some DNA secondary structures is affected and we  
167 observed increase in DSB numbers related to G-quadruplex<sup>15</sup> structures, we obtained  
168 average DSB number 2.1 DSBs per cell. DSB quantification was consistent between the  
169 samples (s.d. 0.3 DSBs per cell) (**Supplementary Fig. 4, Supplementary Table 1**).

## 170 **Applications of qDSB-Seq**

171 **Quantification of DSBs induced by a radiomimetic drug, Zeocin.** Some DSB-inducing  
172 agents affect only particular sequences and structures, while others cause DNA damage  
173 throughout the genome, e.g. irradiation. As DSB sequencing data inform only about read  
174 distribution in the genome and is primarily used to identify regions enriched in reads, even  
175 very large but global DSB induction will be undetectable using typical normalization

176 methods, e.g. normalization to the background. Therefore, to test application of qDSB-Seq  
177 to such a challenging case, we used the radiomimetic agent Zeocin<sup>19</sup>, a member of the  
178 bleomycin drug family. After performing DSB sequencing, no apparent difference in raw  
179 read counts between Zeocin-treated (ZEO) and untreated G<sub>1</sub> phase (G<sub>1</sub>) cells was observed  
180 (**Fig. 3a, Supplementary Fig. 5**). In contrast, after quantification (using qDSB-Seq with  
181 NotI spike-in) we concluded that  $1.1 \pm 0.3$  DSBs/cell were present in the G<sub>1</sub> sample and  
182  $7.4 \pm 1.7$  in ZEO, indicating that Zeocin induced  $6.3 \pm 2.0$  DSBs per cell. Strikingly, Zeocin  
183 significantly increased the number of DSBs (1.7- to 13-fold) in 99.8% of 5 kb genomic  
184 intervals (p-value < 2e-12, hypergeometric test, **Methods**).

185 Interestingly, we observed that Zeocin-induced DSBs are especially enriched (3.0-fold) in  
186 nucleosome-depleted regions (NDR) and reduced (0.4-fold) in nucleosome-protected  
187 regions (both  $p < 10^{-3}$ , permutation test, **Methods**). Specifically, DSBs in the Zeocin-  
188 treated sample occur 1.8 times as often between predicted nucleosome positions<sup>20</sup> as within  
189 nucleosomes (**Fig. 3b**). Moreover, the preference for DSB location between nucleosomes  
190 is even higher (4.1-fold) for long (> 100 nt) NDR regions (**Fig. 3c,d**). However, we do not  
191 observe a 10 bp periodicity corresponding to the rotational positioning of the DNA helix  
192 on the nucleosome. These results are consistent with previous findings that Zeocin-induced  
193 cleavage is most suppressed in nucleosome-bound DNA and that this suppression is not  
194 dependent on inaccessibility of the minor groove, but is caused by inability of the  
195 nucleosome-bound DNA to undergo a conformational change that is required for Zeocin  
196 binding<sup>21</sup>. Zeocin-induced DSBs are also enriched in DNA regions capable of forming very  
197 stable DNA secondary structures (**Fig. 3e**), including G-quadruplexes (G4s)<sup>22</sup>. Further  
198 studies will be necessary to elucidate this phenomenon. Nevertheless, increased DNA  
199 damage on G4 structures could be related to nucleosome remodeling on G4s<sup>23</sup>, consistent  
200 with our finding that Zeocin prefers to cleave nucleosome-free DNA.

201 **Quantification of DSBs induced by replication stress.** We next used qDSB-Seq to  
202 quantify replication-associated DSBs under hydroxyurea-induced replication stress (**Fig.**  
203 **4a**). Hydroxyurea (HU) inhibits ribonucleotide reductase, resulting in decreased dNTP  
204 levels and subsequent replication fork stalling and the slowing down of S phase<sup>24</sup>. Without  
205 the protection of replication checkpoints, stalled forks may undergo catastrophic collapse  
206 at high concentration or prolonged HU treatment<sup>25</sup>, such as we used.

207 Using NotI spike-in, we observed that one hour treatment with 200 mM HU induced on  
208 average  $137.6 \pm 12.0$  DSBs per cell in wild-type yeast cells (WT +HU sample), which  
209 represents a 9-fold increase relative to untreated S phase cells ( $15.4 \pm 3.2$  DSBs per cell).  
210 The detected breaks showed a clear replication-related pattern: a significant enrichment of  
211 DSB signal around replication origins (**Fig. 4b,c**). To further analyze the HU-induced  
212 DSBs we classified them into two-ended DSBs and one-ended DSBs (**Supplementary Fig.**  
213 **6**). Two-ended DSBs arise when two strands of DNA double helix are damaged (by i.e.  
214 endonucleases, radiation or chemical compounds), while broken replication forks result in  
215 one-ended DSBs. We identified one-ended DSBs using our method based on comparing  
216 the number of reads between Watson and Crick strands (**Supplementary Fig. 6, Methods**)  
217 and discovered that among all DSBs detected in HU-treated WT cells  $71.7 \pm 6.2$  DSBs  
218 were one-ended (**Fig. 4d**). Of those, 85% ( $60.6 \pm 5.2$  DSBs) were located within +/-10 kb  
219 regions of active origins, resulting in an average of 0.4 one-ended DSB (broken fork) per  
220 origin (**Fig. 4d**). Such one-ended DSBs would not be detected by some other DSB detecting

221 methods, such as pulse-field gel electrophoresis, which explains some earlier reports that  
222 wild-type yeast cells are not sensitive to HU<sup>25</sup>. The observed one-ended DSBs might  
223 correspond to broken forks resulting from transient DNA breaks occurring on the leading  
224 strand, as reported by Sasaki *et al*<sup>26</sup>. In agreement with this theory, we discovered that two  
225 hours after removal of HU, the number of one-ended DSBs decreased dramatically (by  
226 86%) (**Fig. 4d**), indicating that replication-associated DNA damage present during HU  
227 treatment is not permanent.

228 **Quantification of DSBs at ribosomal replication fork barriers.** Replication fork barriers  
229 (RFBs) are natural barrier that blocks replication forks to protect nearby, highly expressed  
230 rRNA genes from collisions between transcription and replication complexes<sup>26,27</sup> (**Fig. 5a**).  
231 DSBs occurring at the ribosomal replication fork barriers (RFBs) have been observed using  
232 Southern blot in the budding yeast<sup>28-31</sup>. However, precise frequencies and genomic  
233 locations of these DSBs were not established due to lack of a quantitative and sensitive  
234 DSB detection method<sup>26</sup>. Using qDSB-Seq, here we both precisely quantified DSB  
235 frequencies near RFBs and identified their genomic coordinates.

236 It was reported that Fob1 proteins bound to an RFB site block replication fork progression,  
237 resulting in generation of a one-ended DSBs<sup>30</sup>. Indeed, in unperturbed S-phase cells, we  
238 observed 1.1 DSBs per cell (0.0055 DSBs per rDNA repeat) on rDSB-1 and rDSB-2 sites  
239 upstream of RFB1 and RFB2 (two closely spaced RFB loci) (**Fig. 5b,c and**  
240 **Supplementary Table 3**). As expected, we did not detect any DSBs at these sites in G<sub>1</sub>-  
241 arrested cells confirming that the observed DSBs at RFBs are replication-dependent.

242 It was previously shown that Top1 in the presence of Fob1 specifically cleaves defined  
243 sequences in the RFB region<sup>32</sup>. When we inhibited the religation step of Top1 by adding  
244 100  $\mu$ M camptothecin (CPT) for 45 min treatment, we observed a CPT-dependent DSB  
245 site (rDSB-3), exactly at the same location as the previously identified Top1-dependent  
246 cleavage site (**Fig. 5c**). In addition, this site also colocalizes with a Fob1 binding region, in  
247 agreement with a previous discovery that the recruitment and stabilization of Top1 requires  
248 the binding of Fob1 protein<sup>32</sup>. Our quantification shows the DSB frequency at rDSB-3 site  
249 was 0.1 DSB per cell, lower than at rDSB-1 and rDSB-2. Finally, our results agree with  
250 previous work<sup>26</sup> in which approximately one DSB arises in an rDNA array during  
251 replication in a yeast cell (**Fig. 5b**); such low frequencies are caused by recombination in  
252 the rDNA array<sup>26</sup>. Based on the results above, qDSB-Seq fills the need to enable detection  
253 of these rare breaks at replication fork barriers and allowed us for the first time to quantify  
254 the frequency of cleavage of Topoisomerase 1 (Top1) at RFBs.

## 255 **Discussion**

256 We propose qDSB-Seq, a general framework that allows estimating both absolute DSB  
257 frequencies (per cell) and their precise genomic coordinates. qDSB-Seq combines a DSB-  
258 labeling method with a quantification technique; quantification is achieved by inducing  
259 easy-to-measure spike-in DSBs via restriction enzyme digestion.

260 Due to increasing evidence of a relationship between emergence of DSBs and human  
261 diseases such as cancer<sup>1</sup>, there is growing interest in precise detection of DSBs. Several  
262 general genome-wide methods for detection of DSBs with single-nucleotide resolution  
263 have recently been developed<sup>3-6</sup>, however their usefulness is limited because they only  
264 allow comparison of DSB levels between genomic loci within the same sample.

265 Normalization to the total number of reads is often employed to enable comparison  
266 between different samples, but this method is not always applicable. For example, it cannot  
267 be used if DSBs are induced throughout the whole genome or if the DSB background varies,  
268 which is common<sup>33</sup>. Therefore, in case of agents that create such DSB patterns, e.g. by  
269 irradiation or radiomimetic drugs, data normalized to the total reads number will not reveal  
270 global induction of breaks as shown in **Fig. 3a**. In contrast, our approach allows not only  
271 estimation of relative increases of DSB signal between samples (regardless of signal  
272 distribution), but also quantification of absolute DSB numbers per cell. For example, we  
273 discovered that 1 hour treatment with 100 µg/ml Zeocin results in 6.7-times increase in  
274 DSBs, namely from  $1.1 \pm 0.3$  to  $7.4 \pm 1.7$  DSBs per cell. Additionally, we discovered that  
275 Zeocin significantly increases DSB levels in 99.8% of 5kb genomic intervals, but with  
276 differences in ratios: from 1.7- to 13-fold. qDSB-Seq opens up new possibilities in studying  
277 the impact of DSB inductors or gene mutations on genome instability, i.e. it may potentially  
278 allow determining the outcomes of different doses of anticancer drugs in healthy and tumor  
279 cells. Moreover, qDSB-Seq allows assessing DSB frequencies not only for the whole  
280 genome, but also for a specific locus. For instance, using our approach, for the first time  
281 we quantified changes of DSB frequency at RFBs between wild-type and CPT-treated cells,  
282 thus revealing the frequency of Top1-dependent DSBs in RFB region.

283 Key innovation of qDSB-Seq is spike-in DSBs used for normalization. Such spike-in DSBs  
284 can be introduced both *in vivo* and *in vitro*; each manner of digestion has its strengths and  
285 weaknesses. *In vivo* digestion requires organism-specific constructs, such as the I-SceI  
286 yeast strain we used, while *in vitro* digestion can be applied to any organism. Moreover,  
287 for *in vitro* digestion, since spike-in DSBs are never repaired and thus there are no resected  
288 DNA ends. Resected DNA ends may result in spike-in related reads located up to several  
289 kilobases from the cutting sites, which may complicate data analysis. On the other hand,  
290 for *in vivo* digestion it is possible to determine enzyme cutting frequency before addition  
291 of spike-in cells to the sample of interest, which facilitates obtaining final cutting efficiency  
292 in the desired range by selecting desired mixing proportions. *In vivo* digestion can be also  
293 used to study the DNA damage response in systems such as DivA<sup>34</sup>.

294 Enzyme cutting efficiency is a key parameter influencing qDSB-Seq accuracy. As shown  
295 above, using extremely low or high cutting efficiencies may result in inaccurate  
296 quantification results, while within an adequate range (4% to 84%), the number of labeled  
297 reads per DSB (proportionality coefficient  $\alpha$ ) remains constant, which allows for  
298 consistently accurate quantification. If spike-in DSBs are introduced *in vivo*, to achieve  
299 desired cutting efficiency one needs to mix in appropriate proportions cells in which full  
300 digestion (or digestion with known efficiency) was performed with the studied cells. In  
301 case of *in vitro* digestion, the studied cells should be treated with a dose of an enzyme much  
302 lower than recommended for full digestion. The enzyme cutting efficiency can be then  
303 estimated by performing qPCR and, if needed, the dose can be adjusted before sequencing.

304 To facilitate choice of a restriction enzyme for qDSB-Seq experiments we provide lists of  
305 restriction enzymes sorted according to their cutting efficiencies per Mb in the yeast,  
306 human, mouse and fruit fly genomes (**Supplementary Table 4**), as well as Genome-wide  
307 Restriction Enzyme Digestion STatistical Analysis Tool, GREDSTAT, at  
308 <http://bioputer.mimuw.edu.pl:23456>. Enzymes with multiple cutting sites should yield best  
309 quantification results, since estimation of the enzyme cutting frequency will be less

310 influenced by a potential local bias. Constructs with a single enzyme cutting site, such as  
311 the I-SceI strain we employed, allow convenience of using qPCR to determine an enzyme  
312 cutting frequency. Therefore, for enzymes with multiple cutting sites, we developed a  
313 method to estimate enzyme cutting efficiency from gDNA sequencing data, and proved its  
314 accuracy by comparing with qPCR results. On the other hand, usage of rare cutting  
315 enzymes is preferable, since they allow for optimal cutting efficiencies at individual sites  
316 without unnecessarily increasing percentage of spike-ins in total reads. There is no benefit  
317 to using a higher spike-in percentage than necessary; high spike-in percentages, especially  
318 exceeding 30-50% of total reads, may cause quality issues with Illumina sequencing<sup>16</sup>.  
319 Unlike enzyme cutting efficiency, percentage of spike-in reads cannot be determined  
320 before sequencing, since it depends both on enzyme cutting efficiency and number of DSBs  
321 present in the data. Therefore, if there is a probability that high level of spike-ins may be  
322 achieved unintentionally (e.g. during pilot experiments), we recommend using our  
323 modified protocols for generation of high-quality sequencing data from low-diversity  
324 samples<sup>16</sup>.

325 qDSB-Seq is compatible with any DSB labeling technique, but will also share limitations  
326 of the used method. For example, we tested that the type of generated DNA ends will not  
327 determine quantification results when using i-BLESS for DSB labeling. However, as we  
328 discussed in<sup>15</sup>, some DSB sequencing technologies cannot detect all types of DNA ends.  
329 Therefore, qDSB-Seq, when used in combination with such technology, will also exhibit  
330 bias in quantifying DSBs with these types of DNA ends.

331 When interpreting qDSB-Seq results, it is important to keep in mind that qDSB-Seq relies  
332 on sequencing data derived from a population of cells. Therefore, it only yields an average  
333 number of DSBs per cell, which may or may not be representative of a typical single cell.  
334 This problem can be solved by combining qDSB-Seq with a complementary method,  
335 giving insight into population-distribution of DSBs, as we proposed elsewhere<sup>33</sup>.

336 In summary, qDSB-Seq is a novel approach, which allows absolute DSB quantification  
337 genome-wide and accurate cross-sample comparison and can be applied to any organism,  
338 for which a DSB labeling method is available. qDSB-Seq relies on a key innovation, using  
339 spike-in DSBs induced by a restriction enzyme for normalization. Using qDSB-Seq, we  
340 quantified the numbers of DSBs induced by a radiomimetic drug and replication stress;  
341 measured for the first time Top1-dependent DSB frequencies at replication fork barriers  
342 and revealed several orders of magnitude differences in DSB frequencies. Such high  
343 variability in genome breakage highlights the importance of quantification and shows how  
344 challenging data interpretation would be without the normalization provided by qDSB-Seq.

345

## 346 **Acknowledgements**

347 This research was supported by the NIH grant R01GM112131 to M.R. (Y.Z., N.D., B.F.,  
348 J.N., R.Y. and M.R.), Polish National Science Centre grant to M.S.  
349 (2015/17/D/NZ2/03711), and Foundation for Polish Science grant TEAM/2016-2 to K.G.  
350 This work was also supported by Ligue contre le Cancer (Equipe labelisee), Agence  
351 Nationale pour la Recherche (ANR) and Institut National du Cancer (INCa) grants to P.P.  
352 (B.P., R.F. and P.P.), National Science Center grant 2016/21/B/ST6/01471 to N.D., and a  
353 training fellowship from the Gulf Coast Consortia on the Computational Cancer Biology



354 Training Program (CPRIT Grant No. RP170593) to Y.Z. The authors are grateful to  
355 Heather Lander of the Sealy Center for Structural Biology and Molecular Biophysics at  
356 UTMB, for editorial services for the manuscript.

357

### 358 **Author contributions**

359 M.R. conceived qDSB-Seq and supervised and coordinated the project. M.R., Y.Z. and  
360 A.B. wrote the manuscript, K.G. P.P., B.P and M.S. edited the manuscript. Y.Z. performed  
361 data analysis and developed software, N.D. performed initial data analysis and developed  
362 software. A.B., K.G., B.P., P.P. and M.R. designed experiments. A.B. and M.S. performed  
363 i-BLESS and qDSB-Seq experiments. B.P., and R.F. prepared cells. Y.Z. prepared figures.  
364 R.Y., B.F. and J.N. contributed to software development and data analysis. M.S. performed  
365 library preparation and next-generation sequencing. All authors read the manuscript.

366

### 367 **Competing Financial interests**

368 The authors declare no competing financial interests.

369

### 370 **References**

- 371 1. Khanna, K.K. & Jackson, S.P. DNA double-strand breaks: signaling, repair and  
372 the cancer connection. *Nature genetics* **27**, 247-254 (2001).
- 373 2. Slaymaker, I.M. et al. Rationally engineered Cas9 nucleases with improved  
374 specificity. *Science* **351**, 84-88 (2016).
- 375 3. Crosetto, N. et al. Nucleotide-resolution DNA double-strand break mapping  
376 by next-generation sequencing. *Nat Methods* **10**, 361-365 (2013).
- 377 4. Hoffman, E.A., McCulley, A., Haarer, B., Arnak, R. & Feng, W. Break-seq reveals  
378 hydroxyurea-induced chromosome fragility as a result of unscheduled  
379 conflict between DNA replication and transcription. *Genome Res* **25**, 402-412  
380 (2015).
- 381 5. Lensing, S.V. et al. DSBCapture: in situ capture and sequencing of DNA breaks.  
382 *Nature methods* **13**, 855-857 (2016).
- 383 6. Canela, A. et al. DNA Breaks and End Resection Measured Genome-wide by  
384 End Sequencing. *Molecular cell* **63**, 898-911 (2016).
- 385 7. Yan, W.X. et al. BLISS is a versatile and quantitative method for genome-wide  
386 profiling of DNA double-strand breaks. *Nature communications* **8**, 15058  
387 (2017).
- 388 8. Ran, F.A. et al. In vivo genome editing using *Staphylococcus aureus* Cas9.  
389 *Nature* **520**, 186-191 (2015).
- 390 9. Aymard, F. et al. Genome-wide mapping of long-range contacts unveils  
391 clustering of DNA double-strand breaks at damaged active genes. *Nature*  
392 *structural & molecular biology* **24**, 353-361 (2017).

- 393 10. Popp, H.D., Brendel, S., Hofmann, W.K. & Fabarius, A. Immunofluorescence  
394 Microscopy of gammaH2AX and 53BP1 for Analyzing the Formation and  
395 Repair of DNA Double-strand Breaks. *J Vis Exp* (2017).
- 396 11. Chailleux, C. et al. Quantifying DNA double-strand breaks induced by site-  
397 specific endonucleases in living cells by ligation-mediated purification. *Nat*  
398 *Protoc* **9**, 517-528 (2014).
- 399 12. Gregoire, M.C. et al. Quantification and genome-wide mapping of DNA  
400 double-strand breaks. *DNA repair* **48**, 63-68 (2016).
- 401 13. Clement, K., Farouni, R., Bauer, D.E. & Pinello, L. AmpUMI: design and analysis  
402 of unique molecular identifiers for deep amplicon sequencing. *Bioinformatics*  
403 **34**, i202-i210 (2018).
- 404 14. Smith, T., Heger, A. & Sudbery, I. UMI-tools: modeling sequencing errors in  
405 Unique Molecular Identifiers to improve quantification accuracy. *Genome Res*  
406 **27**, 491-499 (2017).
- 407 15. Biernacka, A. et al. i-BLESS is an ultra-sensitive method for detection of DNA  
408 double-strand breaks. *Commun Biol* **1**, 181 (2018).
- 409 16. Mitra, A., Skrzypczak, M., Ginalski, K. & Rowicka, M. Strategies for achieving  
410 high sequencing accuracy for low diversity samples and avoiding sample  
411 bleeding using illumina platform. *PLoS One* **10**, e0120520 (2015).
- 412 17. Lobrich, M. et al. gammaH2AX foci analysis for monitoring DNA double-  
413 strand break repair: strengths, limitations and optimization. *Cell Cycle* **9**, 662-  
414 669 (2010).
- 415 18. Thongsroy, J. et al. Replication-independent endogenous DNA double-strand  
416 breaks in *Saccharomyces cerevisiae* model. *PLoS One* **8**, e72706 (2013).
- 417 19. Shimada, K. et al. TORC2 signaling pathway guarantees genome stability in  
418 the face of DNA strand breaks. *Molecular cell* **51**, 829-839 (2013).
- 419 20. Lee, W. et al. A high-resolution atlas of nucleosome occupancy in yeast.  
420 *Nature genetics* **39**, 1235-1244 (2007).
- 421 21. Povirk, L.F. DNA damage and mutagenesis by radiomimetic DNA-cleaving  
422 agents: bleomycin, neocarzinostatin and other enediynes. *Mutat Res* **355**, 71-  
423 89 (1996).
- 424 22. Bochman, M.L., Paeschke, K. & Zakian, V.A. DNA secondary structures:  
425 stability and function of G-quadruplex structures. *Nature reviews. Genetics*  
426 **13**, 770-780 (2012).
- 427 23. Hershman, S.G. et al. Genomic distribution and functional analyses of  
428 potential G-quadruplex-forming sequences in *Saccharomyces cerevisiae*.  
429 *Nucleic acids research* **36**, 144-156 (2008).
- 430 24. Koc, A., Wheeler, L.J., Mathews, C.K. & Merrill, G.F. Hydroxyurea arrests DNA  
431 replication by a mechanism that preserves basal dNTP pools. *The Journal of*  
432 *biological chemistry* **279**, 223-230 (2004).
- 433 25. Singh, A. & Xu, Y.J. The Cell Killing Mechanisms of Hydroxyurea. *Genes (Basel)*  
434 **7** (2016).
- 435 26. Sasaki, M. & Kobayashi, T. Ctf4 Prevents Genome Rearrangements by  
436 Suppressing DNA Double-Strand Break Formation and Its End Resection at  
437 Arrested Replication Forks. *Molecular cell* **66**, 533-545 e535 (2017).

- 438 27. Kobayashi, T. The replication fork barrier site forms a unique structure with  
439 Fob1p and inhibits the replication fork. *Molecular and cellular biology* **23**,  
440 9178-9188 (2003).
- 441 28. Kobayashi, T., Horiuchi, T., Tongaonkar, P., Vu, L. & Nomura, M. SIR2  
442 regulates recombination between different rDNA repeats, but not  
443 recombination within individual rRNA genes in yeast. *Cell* **117**, 441-453  
444 (2004).
- 445 29. Weitao, T., Budd, M. & Campbell, J.L. Evidence that yeast SGS1, DNA2, SRS2,  
446 and FOB1 interact to maintain rDNA stability. *Mutat Res* **532**, 157-172  
447 (2003).
- 448 30. Burkhalter, M.D. & Sogo, J.M. rDNA enhancer affects replication initiation and  
449 mitotic recombination: Fob1 mediates nucleolytic processing independently  
450 of replication. *Molecular cell* **15**, 409-421 (2004).
- 451 31. Weitao, T., Budd, M., Hoopes, L.L. & Campbell, J.L. Dna2 helicase/nuclease  
452 causes replicative fork stalling and double-strand breaks in the ribosomal  
453 DNA of *Saccharomyces cerevisiae*. *The Journal of biological chemistry* **278**,  
454 22513-22522 (2003).
- 455 32. Di Felice, F., Cioci, F. & Camilloni, G. FOB1 affects DNA topoisomerase I in vivo  
456 cleavages in the enhancer region of the *Saccharomyces cerevisiae* ribosomal  
457 DNA locus. *Nucleic acids research* **33**, 6327-6337 (2005).
- 458 33. Zhu, Y., Biernacka, A., Pardo, B., Forey, R., Dojer, N., Yousefi, R., Nde, J.,  
459 Fongang, B., Mitra, A., Li, J., Skrzypczak, M., Kudlicki, A., Pasero, P., Ginalski, K.,  
460 Rowicka, M. Integrated analysis of patterns of DNA breaks reveals break  
461 formation mechanisms and their population distribution during replication  
462 stress. *BioRxiv* (2017).
- 463 34. Caron, P. et al. Non-redundant Functions of ATM and DNA-PKcs in Response  
464 to DNA Double-Strand Breaks. *Cell Rep* **13**, 1598-1609 (2015).
- 465 35. Schmittgen, T.D. & Livak, K.J. Analyzing real-time PCR data by the  
466 comparative C-T method. *Nat Protoc* **3**, 1101-1108 (2008).
- 467 36. Langmead, B., Trapnell, C., Pop, M. & Salzberg, S.L. Ultrafast and memory-  
468 efficient alignment of short DNA sequences to the human genome. *Genome*  
469 *Biol* **10**, R25 (2009).
- 470 37. Markham, N.R. & Zuker, M. DINAMelt web server for nucleic acid melting  
471 prediction. *Nucleic acids research* **33**, W577-581 (2005).
- 472 38. Kudlicki, A.S. G-Quadruplexes Involving Both Strands of Genomic DNA Are  
473 Highly Abundant and Colocalize with Functional Sites in the Human Genome.  
474 *PLoS One* **11**, e0146174 (2016).
- 475 39. Yabuki, N., Terashima, H. & Kitada, K. Mapping of early firing origins on a  
476 replication profile of budding yeast. *Genes to cells : devoted to molecular &*  
477 *cellular mechanisms* **7**, 781-789 (2002).

478

## 479 **ONLINE METHODS**

480 **Strains and growth conditions.** Yeast strains used in this study are listed in

481 **Supplementary Table 5.** Cells were grown in YPD medium at 25°C until early log phase  
482 and were then arrested in G<sub>1</sub> for 170 min with 8 µg/ml α-factor. For exposure to Zeocin  
483 cells were treated with 100 µg/ml Zeocin (Invivogen) for 1 hour. The I-SceI strain was  
484 cultured in YPR medium, galactose was added for 2 h to induce I-SceI cutting. For  
485 exposure to hydroxyurea, cells were released from G<sub>1</sub> arrest by addition of 75 µg/ml  
486 Pronase (Sigma) and 200 mM HU was added 20 min before Pronase release followed by 1  
487 h incubation. Collected cells were washed with cold SE buffer (5M NaCl, 500 mM EDTA,  
488 pH 7.5) and immediately subjected to DSB labeling.

489  
490 **DSB sequencing.** DSB labeling was performed using our i-BLESS method as described  
491 in<sup>15</sup>. Zeocin treated cells were additionally subjected to reaction with NEBNext® FFPE  
492 DNA Repair Mix prior to proximal adapter ligation. Sequencing libraries for i-BLESS and  
493 respective gDNA samples were prepared using ThruPLEX DNA-seq Kit (Rubicon  
494 Genomics). i-BLESS libraries were prepared without prior fragmentation and further size  
495 selection. Quality and quantity of the libraries were assessed on a 2100 Bioanalyzer using  
496 HS DNA Kit, and on a Qubit 2.0 Fluorometer using Qubit dsDNA HS Assay Kit (Life  
497 Technologies). The libraries were sequenced (2x70bp) on Illumina HiSeq2500/HiSeq4000  
498 platforms, according to our modified experimental and software protocols for generation  
499 of high-quality data from low-diversity samples<sup>16</sup>.

500  
501 **qDSB-Seq with NotI, SrfI, AsiSI, and BamHI digestion.** In addition to DSB sequencing,  
502 as described above, a digestion with a restriction enzyme was performed before DSB  
503 labeling. Samples were treated with NotI (NEB, Thermo Scientific), SrfI (NEB), AsiSI  
504 (NEB), or BamHI (Thermo Scientific) for 1 h at 37°C. The dose and incubation time of  
505 these restriction enzymes were listed in **Supplementary Table 6**.

506  
507 **qDSB-Seq with I-SceI spike-in.** For I-SceI spike-in we used a yeast strain (I-SceI strain)  
508 with GAL inducible I-SceI endonuclease and a single I-SceI cutting site integrated at the  
509 ADH4 locus on chromosome VII. To measure the cleavage efficiency of I-SceI, cell  
510 aliquots were taken pre- (RAFF) and 2 h post- (GAL) cleavage induction, and total  
511 genomic DNA was extracted. DNA was serially diluted and amplified for 25 cycles with  
512 primers spanning the I-SceI cutting site. Cleavage efficiency was inferred by comparing  
513 the amount of amplified DNA in GAL (cut) vs. RAFF (uncut) conditions. We used CASY  
514 Cell Counter (Roche Applied Science) to mix this spike-in with our sample of interest  
515 (wild-type cells with replication stress induced by hydroxyurea treatment) in proportion  
516 2:98. The cutting ratio of the I-SceI endonuclease expressed in the I-SceI strain was  
517 estimated using an unmixed I-SceI strain and **Equation (1)** below.

518 **Quantitative PCR.** To validate cutting efficiency for NotI, input gDNA was analyzed by  
519 real-time PCR using primers flanking a selected NotI site at chrI: 114016-114023 (forward:  
520 AGAGTTGGGAATGTGTGCC, reverse: GGGCAGCAACACAAAGTGTC) and  
521 KAPA SYBR® FAST kit (Life Technologies). Four technical replicates using two  
522 different concentrations of input DNA were performed. We compared the amount of PCR  
523 product amplified in untreated (C) vs. NotI treated cells (T) by data analysis based on the  
524  $\Delta C_T$  method<sup>35</sup>, where the  $\Delta C_T$  value was obtained by subtraction of the  $C_T$  value in sample  
525 C from the  $C_T$  value in sample T. Final cutting efficiency was calculated as mean efficiency  
526 for all dilutions according to the formula below:

527 
$$f_{cut} = 1 - \frac{1}{2^{\Delta C_T}}$$

528 We used calibration data to empirically correct  $\Delta C_T$ .

529 **Sequencing data analysis.** We used *iSeq* (<http://breakome.eu/software.html>) to ensure  
530 sequencing data quality before mapping. Next, *iSeq* was used to remove i-BLESS proximal  
531 and distal barcodes (TCGAGGTAGTA and TCGAGACGACG, respectively). Reads  
532 labeled with the proximal barcode, which are directly adjacent to DSBs, were selected and  
533 mapped to the version of the yeast S288C genome sacCer3 (we manually corrected  
534 common polymorphisms) using bowtie<sup>36</sup> v0.12.2 with the alignment parameters ‘-m1 -v1’  
535 (to exclude ambiguous mapping and low-quality reads). For ribosomal DNA mapping in  
536 replication fork barrier analysis, we mapped sequencing reads using the parameter ‘-v1’ to  
537 allow multiple mapped reads. The end base pairs of the reads were trimmed using bowtie  
538 ‘-3’ parameter. The parameter choice was based on the *iSeq* quality report. For calculation  
539 of the absolute number of DSBs per cell only mapped reads were retained. Further, the  
540 reads identified as originating from telomere ends were removed. The telomeric reads were  
541 identified as those exhibiting the CAC motif in the whole AC-rich strand; regular  
542 expression `C{0,3}AC{1,10}` in the PERL language was used to identify them.

543  
544 **Calculation of DSB frequencies per cell.** Paired-end sequencing of gDNA or qPCR was  
545 used to measure the cutting efficiency of the endonuclease. For an enzyme with a single  
546 cutting site (e.g. I-SceI), we used the following procedure to calculate cutting efficiency  
547 ( $f_{cut}$ ) from whole genome paired-end sequencing data:

548 
$$f_{cut} = \frac{N_{cut}}{N_{cut} + 2N_{uncut}} - f_{bg} \quad (1)$$

549 where,  $N_{cut}$  is the number of fragments cut by an enzyme,  $N_{uncut}$  is the number of uncut  
550 fragments covering the cutting site, and  $f_{bg}$  is the background level of breaks (e.g. resulting  
551 from sonication).  $N_{cut}$  fragments were counted in empirically determined, several  
552 nucleotide vicinities of the canonical cutting sites, based on visual examination of the read  
553 distribution. For enzyme with multiple cutting sites, reads mapped to each cutting site were  
554 first classified as “cut” or “uncut” and the results were summed over all cutting sites:

555 
$$f_{cut} = \frac{\sum_{i=1}^{N_{sites}} N_{cut}^i}{\sum_{i=1}^{N_{sites}} N_{cut}^i + 2 \sum_{i=1}^{N_{sites}} N_{uncut}^i} - f_{bg}$$

556 To estimate cutting efficiency, we used only cutting sites to which > 100 paired-end reads  
557 were mapped and their cutting efficiency was larger than 0. To estimate  $f_{bg}$ , we randomly  
558 selected genomic windows of the same size as those used to count cut and uncut fragments  
559 and estimated "cutting efficiency" in those intervals using the left part of **Equation (1)**. For  
560 clarity, these errors are omitted in **Equations (2) to (4)**.

561 Next, we calculated the number of spike-in DSBs induced at restriction sites,  $B_{cut}$ :

562 
$$B_{cut} = f_{cut} N_{sites} p \quad (2)$$

563 where  $f_{cut}$  is the cutting efficiency in undiluted samples,  $N_{sites}$  is the number of used enzyme  
564 restriction sites (e.g. 39 for NotI) and  $p$  is the proportion of digested cells ( $p = 1$  unless  
565 mixing with an *in vivo* digested construct is used).

566 Then we computed the number of mapped sequencing reads per DSB or the coefficient,  $\alpha$ :

567 
$$\alpha = \frac{R_{cut}}{B_{cut}} \quad (3)$$

568 where  $R_{cut}$  is the number of labeled reads mapped to the cutting sites and  $B_{cut}$  is the total  
569 number of induced DSBs.

570 Finally, we computed studied DSBs per cell ( $B_{studied}$ ) using the following formula:

571 
$$B_{studied} = \frac{R_{studied}}{\alpha} \quad (4)$$

572 where  $B_{studied}$  is the number of studied DSBs per cell in the whole genome, or in a specific  
573 region (eg. a replication region), or at a specific location (eg. an enzyme cutting site). In  
574 this study, we calculated the studied breaks per cell for the whole genome after subtracting  
575 reads generated from enzyme cutting sites, telomeres, and ribosomal DNA. Errors for  
576  $B_{studied}$  are the standard deviation of breaks calculated from different cutting sites for  
577 enzymes with multiple cutting sites (**Supplementary Table 1**). Based on replicates, we  
578 concluded that thus calculated errors are conservatively estimated. For an enzyme with a  
579 single cutting site in a given genome, errors for  $B_{cell}$  were assigned using computed errors  
580 of the cutting efficiencies from  $f_{bg}$ .

581

582 **Background estimation and removal.** To quantify DSBs likely resulting from broken  
583 forks near origins, we first removed background not related to replication. To define such  
584 background, we calculated DSB density in a 500 bp sliding window with a 50 bp step; the  
585 peak of this distribution was assumed to be background DSB frequency. This background  
586 was subtracted from the data at each position, resulting negative values were assigned to  
587 zero.

588

589 **Analysis of fragile regions and enrichment.** Hygestat\_BLESS v1.2.3 in the *iSeq* package  
590 (<http://breakome.eu/software.html>) was used to identify fragile regions (i.e. regions with  
591 significant increase of the read numbers in treatment versus control samples), which were  
592 defined using the hypergeometric probability distribution and Benjamini-Hochberg  
593 correction. To evaluate the enrichment of fragile regions on nucleosomes, we used  
594 hygestat\_annotations v2.0, which computed the proportion of mappable nucleotides  
595 belonging to both the fragile regions and the nucleosomes, and the proportion of mappable  
596 nucleotides belonging to both genomic regions and the nucleosomes. To estimate the p-  
597 value for the feature enrichment inside fragile regions, we used 1000 permutations to  
598 calculate the empirical distribution of the ratio under the null hypothesis.

599

600 **Estimation of one-ended DSBs.** To estimate the total number of one-ended DSBs, we  
601 performed hypergeometric test based on the number of i-BLESS sequencing reads from  
602 Watson and Crick strands using Hygestat\_BLESS v1.2.3 in the *iSeq* package with a 500 nt  
603 window size. Regions with  $P < 1e-10$  were classified as one-ended DSB regions,  $P$  value  
604 was corrected by the Bonferroni correction. The subtraction between reads from Watson  
605 and Crick was treated as the number of one-ended reads used to calculate one-ended DSBs  
606 using the DSB calculation method.

607

608 **Comparison of DSB levels between ZEO and G<sub>1</sub> samples.** We used read counts for 5000  
609 nt mappable intervals produced by hygestat\_BLESS; ZEO read numbers were normalized

610 using qDSB-Seq quantification. We evaluated the null hypothesis that the number of DSBs  
611 in G<sub>1</sub> cells is the same or lower than in ZEO using very conservative 5 standard deviation  
612 confidence intervals (assuming Poisson distribution of reads). All genomic windows  
613 with >17 reads in 5 kb were significantly enriched in DSBs in ZEO as compared with G<sub>1</sub>  
614 cells ( $P < 2e-12$ , calculated using the hypergeometric probability distribution and the  
615 Bonferroni correction).

616

617 **DNA secondary structure and G-quadruplex prediction.** DNA secondary structures  
618 were defined by free energy at 37°C using UNAFold<sup>37</sup> v3.8 in a 50 bp sliding window with  
619 a 25 bp step along the whole yeast genome. We predicted G-quadruplexes (both canonical  
620 intrastrand and non-canonical inter-strand) in the budding yeast genome using AllQuads<sup>38</sup>  
621 software, with the standard 7-nt threshold on loop length.

622 **Statistical analysis.** Results of quantification are shown as mean  $\pm$  s.d. To conduct  
623 enrichment analysis, the  $P$  values were first calculated using the hypergeometric  
624 distribution function as implemented in the GNU Scientific Library for C++ and then  
625 corrected for multiple hypothesis testing using the Benjamini-Hochberg method. The  
626 threshold for statistical significance was  $P < 0.05$ .

627 **Code availability.** Custom code used in this study is available upon request from authors  
628 or <http://breakome.eu/software.html>.

629

630 **Data availability.** The DSB sequencing data will be available upon publication at  
631 Sequence Read Archive.

## Figures

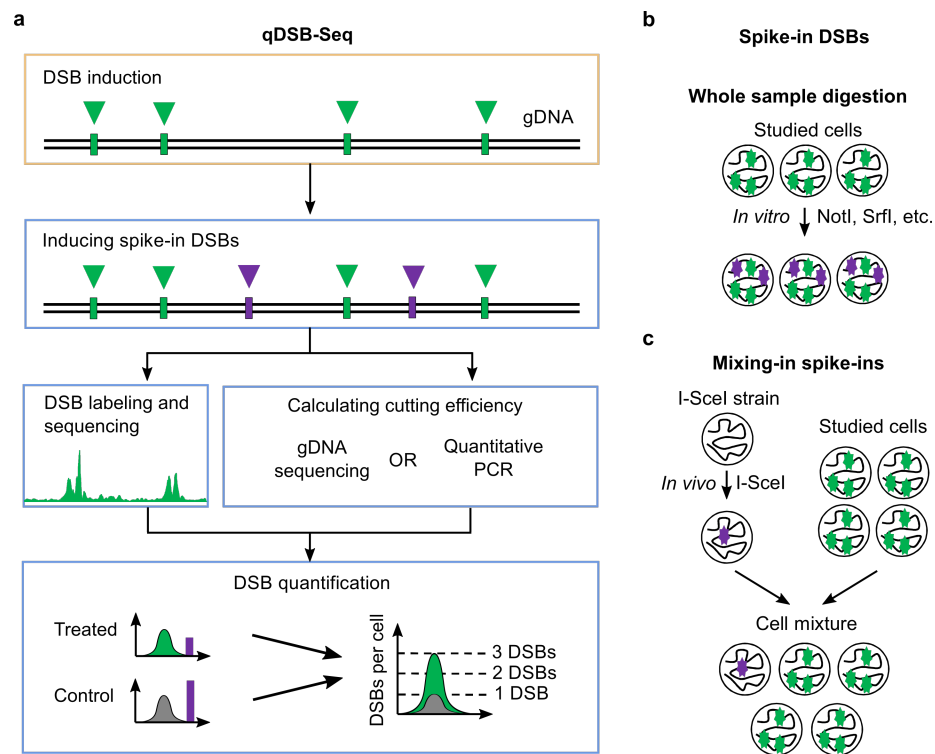

**Figure 1. qDSB-Seq method.** (a) In qDSB-Seq protocol after DSBs induction, cells are treated with a restriction enzyme to introduce site-specific, infrequent DSBs (spike-ins). Next, DSBs are labeled (using e.g. i-BLESS) and sequenced. Simultaneously, gDNA sequencing (or qPCR) is performed and used to estimate the cutting efficiency of the enzyme, and thus frequency of induced DSB spike-ins, which is then used to quantify the absolute DSB frequency (per cell) of studied DSBs in the sample (**Methods**). (b-c) Spike-in DSBs were induced in two different ways: (b) the studied cells were digested using the NotI, SrfI, AsiSI, or BamHI restriction enzyme *in vitro*; (c) cells expressing the restriction enzyme I-SceI *in vivo* (the I-SceI strain) were mixed with the studied cells.



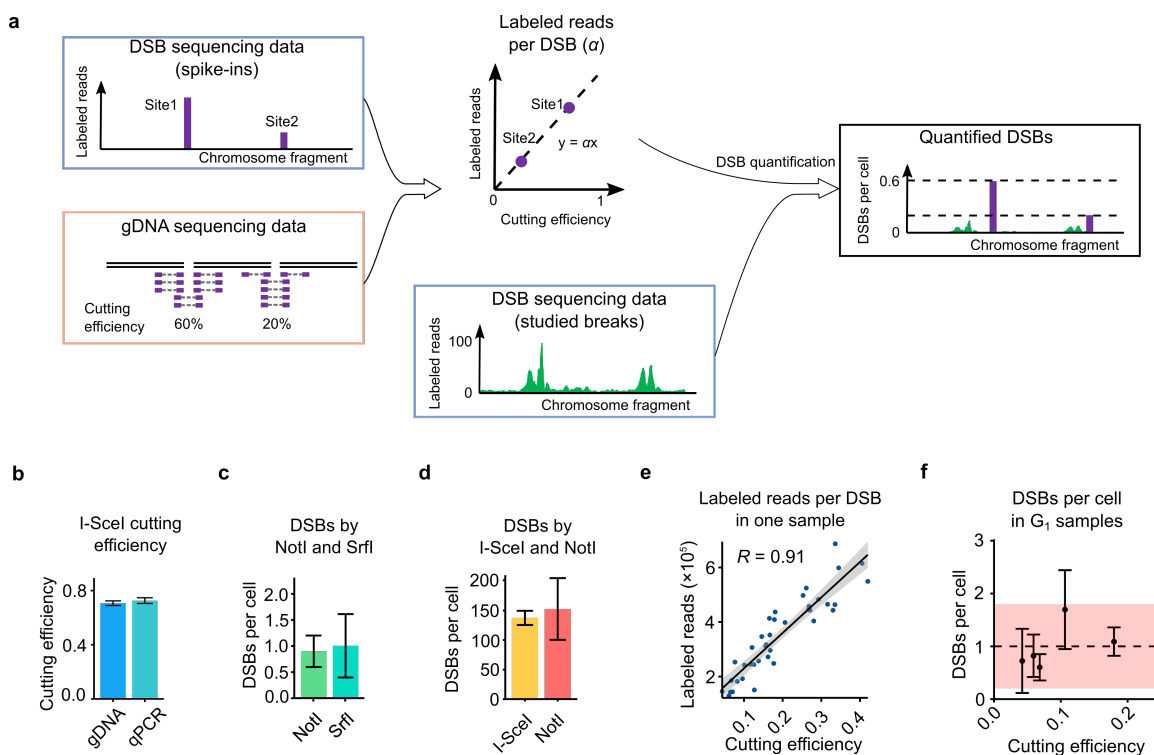

**Figure 2. qDSB-Seq computation and validation.** **(a)** Computation of the labeled reads per DSB and DSBs per cell. The ratio of the labeled reads and cutting efficiency at enzyme cutting sites was calculated and then used for DSB quantification in the studied genomic loci. **(b)** The estimation of I-SceI cutting efficiency based on gDNA sequencing and qPCR (error was calculated from technical replicates). **(c-d)** Dependence of qDSB-Seq quantification on the restriction enzyme used. DSB levels obtained for **(c)** untreated WT  $G_1$  phase cells, and for **(d)** HU-treated WT S phase cells quantified using NotI and SrfI digestion *in vitro* and I-SceI digestion *in vivo* (errors of the estimated DSB frequencies were calculated as described in **Methods**). **(e)** Correlation between the number of labeled reads at cutting sites and their cutting efficiencies in an untreated  $G_1$  phase sample, digested with NotI enzyme with average cutting efficiency of 18%.  $R$ : Pearson correlation coefficient. **(f)** Quantification of DSBs in untreated  $G_1$  phase cells. The dashed lines and the stripes are the mean value and 95% confidence interval, respectively. Mean  $\pm$  s.d. is shown for each sample.

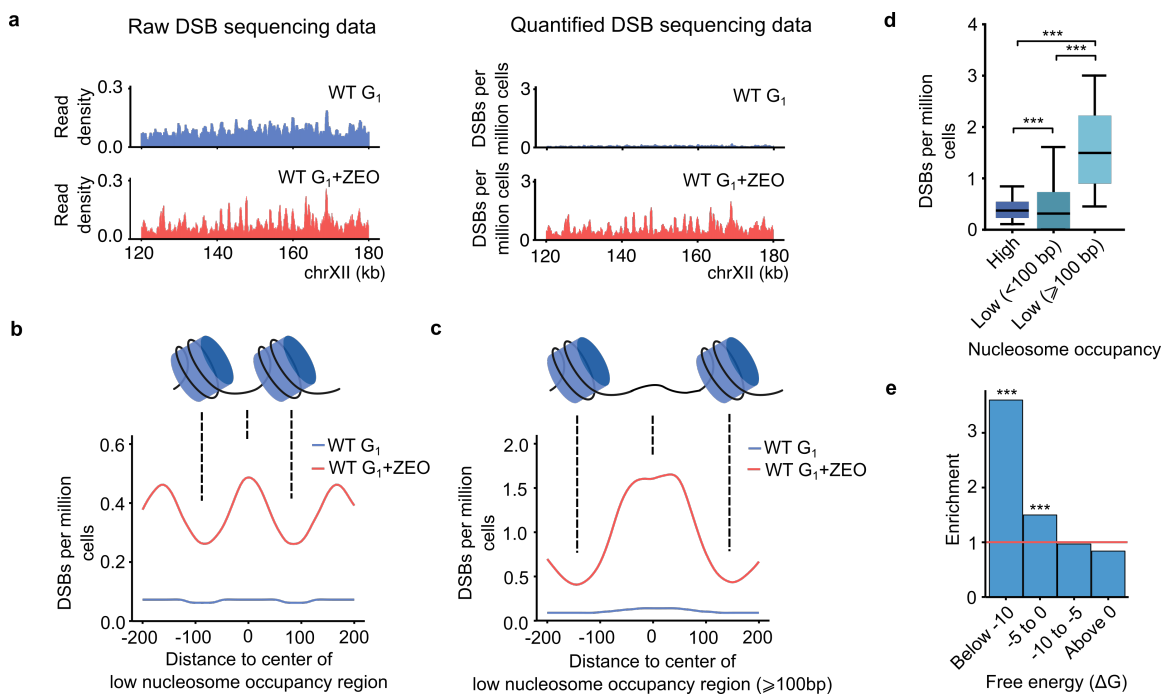

**Figure 3. Quantification of Zeocin-induced DSBs.** (a) Raw read density and quantified DSB density (500 bp sliding window with 50 bp step) in a representative fragment of chromosome XII for untreated and Zeocin-treated wild-type  $G_1$  phase cells. Raw read density was normalized to the total number of reads. (b-c) Density of Zeocin-induced DSBs in (b) all and (c)  $\geq 100$  bp low nucleosome occupancy regions. Nucleosome locations from Lee *et al.*<sup>20</sup> were used, DSB densities, expressed as DSBs per million cells, were calculated in a 50 bp sliding window with a 5 bp step. (d) Comparison of DSB densities in high nucleosome occupancy regions (High) and low nucleosome occupancy regions (Low). (e) Enrichment of Zeocin-induced DSBs in regions prone to form very stable DNA secondary structures (e.g. hairpins), as defined by free energy in a 50 bp sliding window as described in **Methods**. Zeocin-induced DSBs were defined as regions with significant enrichment of DSB-labeled reads in ZEO sample compared with  $G_1$  phase control, as identified using Hygestat\_BLESS. Enrichment analysis was performed using hygestat\_annotations (**Methods**).  $P$  values: \*  $P < 0.05$ , \*\*  $P < 0.01$ , \*\*\*  $P < 0.001$ .

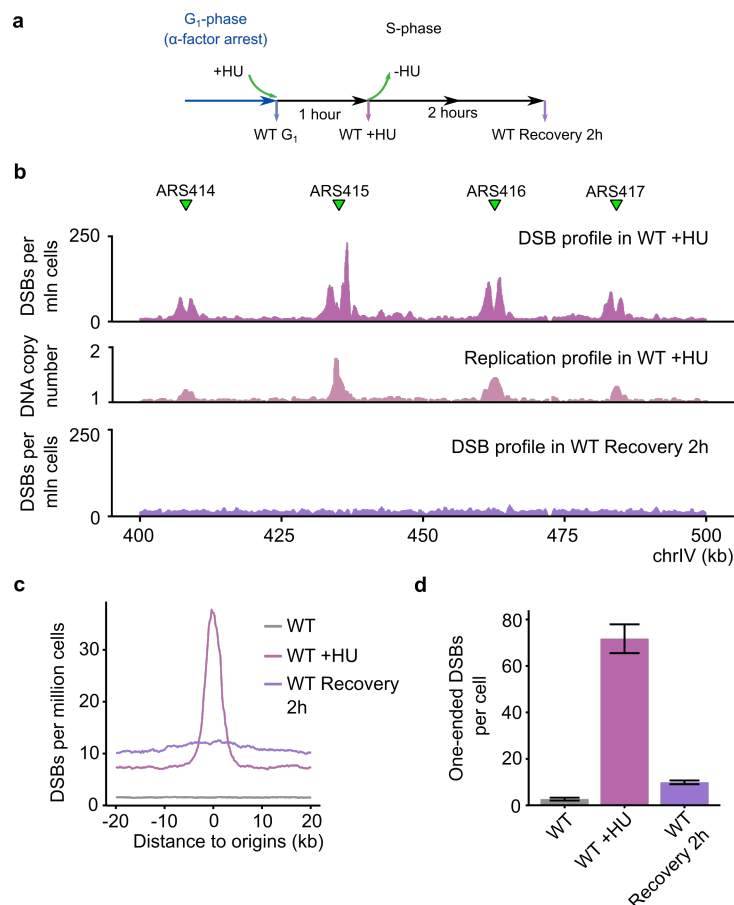

**Figure 4. Quantification of replication-associated DSBs.** (a) Schematic representation of HU experiments. Cells were arrested in G<sub>1</sub> phase with α-factor, treated with HU before release to S phase, harvested after 1 hour or resuspended in fresh medium and harvested 2 hours after removal of HU. (b) Example of quantified DSB data from HU-treated wild-type and 2-hour recovery cells. Replication origins are marked with green triangles, absolute frequencies of DSBs for a fragment of chromosome IV are shown in a million cells. As a control, replication profile (values of DNA copy number) in WT +HU sample is shown, for which the number of gDNA reads in a 500 bp window in WT +HU sample was normalized by G<sub>1</sub> sample. (c) Meta-profile of DSBs around active replication origins under HU treatment, defined as 144 origins with firing time < 25 min (early origins, firing time according to Yabuki *et al.*<sup>39</sup>). Median of DSB densities, expressed as DSBs per million cells in 2 kb window around each early origin, was calculated, the background was removed as described in **Methods**. (d) Quantification of one-ended DSBs. Errors of the estimated one-ended DSB frequencies were calculated as described in **Methods**.

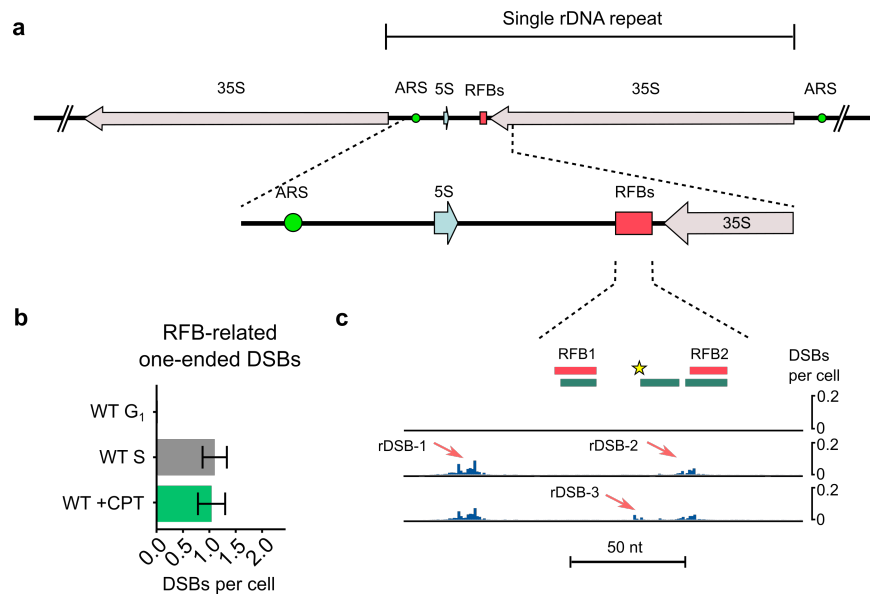

**Figure 5. DNA double-strand breaks at replication fork barriers. (a)** Scheme of Replication Fork Barriers (RFBs) at yeast rDNA locus. **(b)** The total number of RFB-related one-ended DSBs (peaks as defined in panel **c**) calculated from the difference of Watson and Crick strand reads (**Methods**); **(c)** Quantified DSBs signal in RFB region. RFB1 and RFB2 are indicated by the red boxes on the top. The green boxes mark Fob1 protein binding sites mapped *in vitro*. The yellow star indicates Top1 cleavage site. The red arrows point out the observed ribosomal DSB sites, rDSB-1, rDSB-2, and rDSB-3.
